# Supplementary material
Source: PubMed Central journal article supplement (PMC5242338)
Supplement: NIHMS840484-supplement-Supplemental.pdf [file NIHMS840484-supplement-Supplemental.pdf]

## Supplementary material

# Al[<sup>18</sup>F]NOTA-T140 Peptide for Noninvasive Visualization of CXCR4 Expression

**Journal: Molecular Imaging and Biology**

Xuefeng Yan<sup>1,2,3</sup>, Gang Niu<sup>2</sup>, Zhe Wang<sup>2</sup>, Xiangyu Yang<sup>2</sup>, Dale O. Kiesewetter<sup>2</sup>, Orit Jacobson<sup>2\*</sup>, Baozhong Shen<sup>1,3\*</sup>, and Xiaoyuan Chen<sup>2\*</sup>

<sup>1</sup>*Department of Radiology, the Fourth Hospital of Harbin Medical University, Harbin, Heilongjiang, China*

<sup>2</sup>*Laboratory of Molecular Imaging and Nanomedicine (LOMIN), National Institute of Biomedical Imaging and Bioengineering (NIBIB), National Institutes of Health (NIH), Bethesda, Maryland*

<sup>3</sup>*Molecular Imaging Center of Harbin Medical University, Harbin, Heilongjiang, China*

\* Correspondence: Orit Jacobson ([orit.jacobsonweiss@nih.gov](mailto:orit.jacobsonweiss@nih.gov)); Baozhong Shen ([shenbzh@vip.sina.com](mailto:shenbzh@vip.sina.com)); Xiaoyuan Chen ([shawn.chen@nih.gov](mailto:shawn.chen@nih.gov))

## **Materials and Methods**

### **Flow Cytometry.**

Flow cytometry was performed on Accuri C6 flow cytometer using C Flow Plus software (BD, Ann Arbor, MI), and the data was analyzed with FlowJo (Tree Star, Ashland, OR, USA). The CXCR4 expression levels were confirmed by staining using PE-conjugated antihuman

CXCR4 or matched isotype control (R&D, Minneapolis, MN, USA), while unstained cells were used as blank control.

### Stability of Al<sup>18</sup>F]-NOTA-T140 in mouse serum

Al<sup>18</sup>F]NOTA-T140 (25  $\mu$ L, 11MBq) was incubated with 500  $\mu$ L mouse serum at 37 °C for 0.5, 1, and 2h. At each time point, an aliquot was taken and placed on iTLC plate. 0.1 mol/L citric acid (pH 5) was used as a developing solvent.

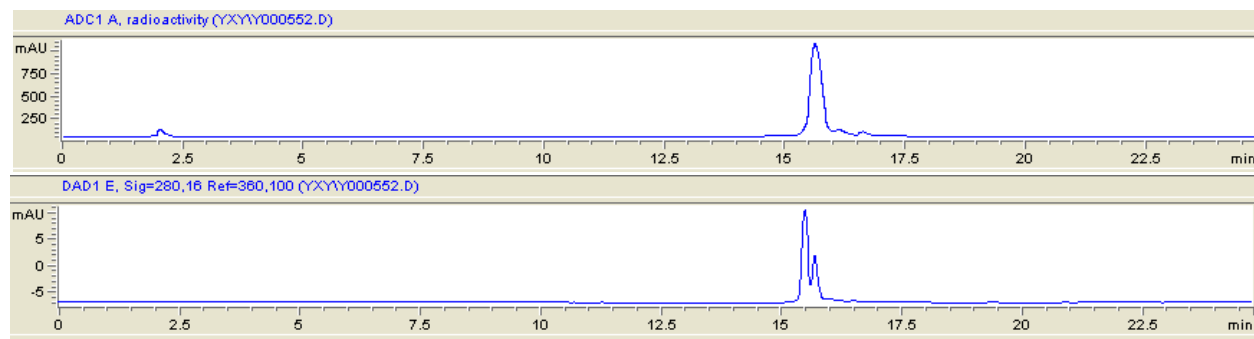

**Supplemental Figure S1.** Representative HPLC chromatogram of Al<sup>18</sup>F]NOTA-T140 crude reaction (radioactivity – upper panel, UV@280nm – lower panel).

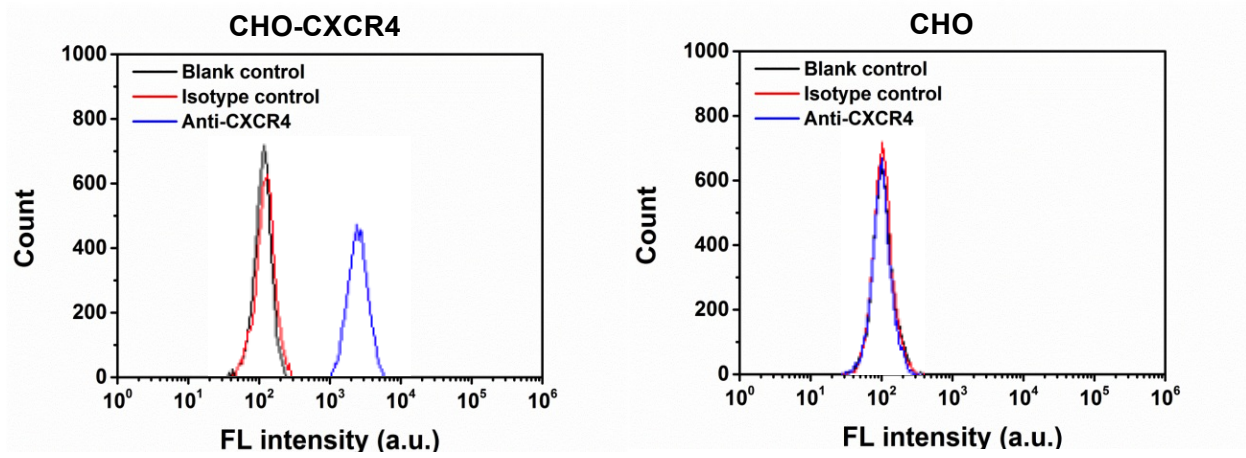

**Supplemental Figure S2.** CXCR4 expression of CHO-CXCR4 and CHO cell lines analyzed by flow cytometry.

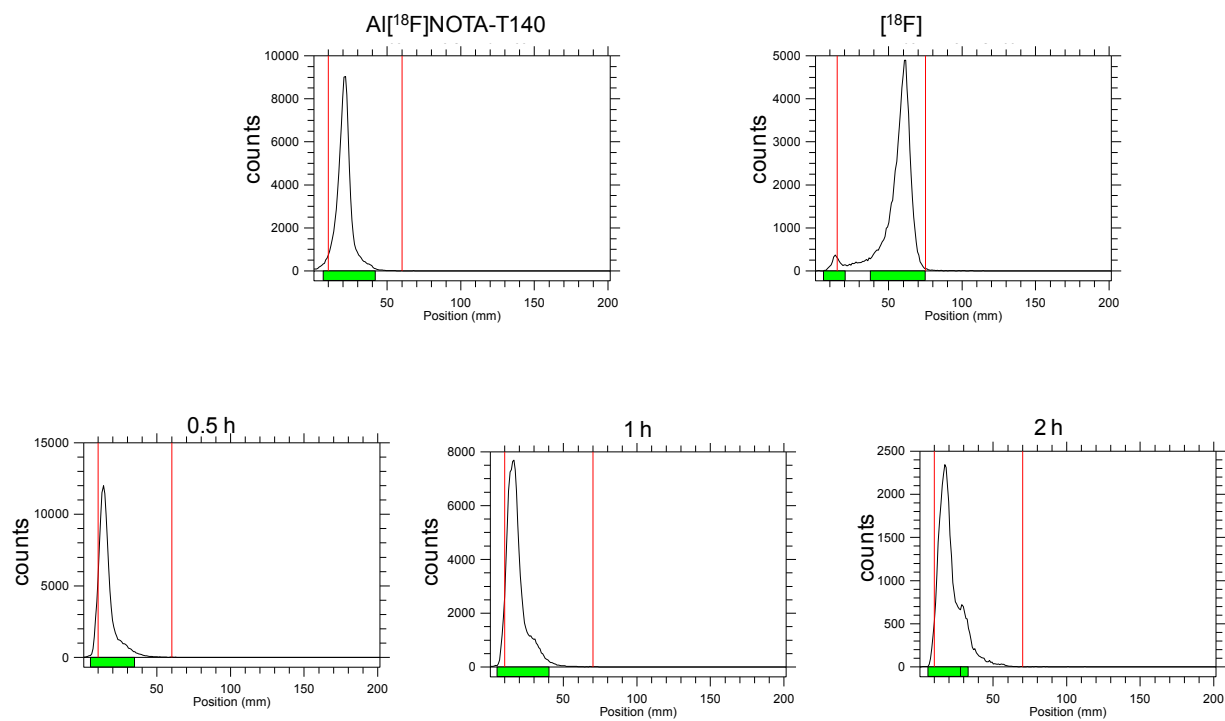

**Supplemental Figure S3.** Upper row: radio-TLC measurement of Al<sup>[18F]</sup>NOTA-T140 (left, rf = 0.05) and free fluoride-18 (right, rf = 0.87). Lower row: radio-TLC measurement achieved from stability of Al<sup>[18F]</sup>NOTA-T140 in mouse serum for 0.5, 1 and 2 h at 37 °C.
